# Supplementary material for: How glyphosate and its associated acidity affect early development in zebrafish (Danio rerio)
Source: PeerJ. 2019 Jun 19;7:e7094. doi: 10.7717/peerj.7094 (PMC6589083; doi:10.7717/peerj.7094)
Supplement: Supplemental Information 1 [file peerj-07-7094-s001.xlsx]

## Sheet: Mortality
Glyphosate
Mortality over time
unbuffered
Treatment	Run	Timepoint [hpf]							# Individuals	Cumulative mortality
		0	12	24	48	60	72	96		#	%
Control	1	0	0	0	0	0	0	0	32	0	0
10 µM	1	0	0	0	0	0	0	0	32	0	0
50 µM	1	0	0	0	0	0	0	0	32	0	0
100 µM	1	0	0	0	0	0	0	0	32	0	0
250 µM	1	0	0	0	0	0	0	0	32	0	0
500 µM	1	0	0	3	0	3	1	7	18	14	43.75
750 µM	1	0	8	5	2	2	3	8	1	28	96.5517	→ 3 excluded
1 mM	1	0	28	4	0	0	0	0	0	32	100
10 mM	1	0	32	0	0	0	0	0	0	32	100
7dSh	1	0	0	0	0	0	0	0	32	0	0
Control	2	0	0	0	0	0	0	0	32	0	0
10 µM	2	0	0	0	0	0	0	0	32	0	0
50 µM	2	0	0	0	0	0	0	0	32	0	0
100 µM	2	0	0	0	0	0	0	0	32	0	0
250 µM	2	0	2	0	0	0	0	0	30	2	6.25
500 µM	2	0	5	4	0	0	0	2	21	11	34.375
750 µM	2	0	12	4	1	1	5	6	3	29	90.625
1 mM	2	0	30	1	1	0	0	0	0	32	100
10 mM	2	0	32	0	0	0	0	0	0	32	100
7dSh	2	0	0	0	0	0	0	0	32	0	0
Control	3	0	0	0	0	0	0	0	32	0	0
10 µM	3	0	1	0	0	0	0	0	31	1	3.125
50 µM	3	0	0	0	0	0	0	0	32	0	0
100 µM	3	0	0	0	0	0	0	0	32	0	0
250 µM	3	0	1	0	0	0	0	0	31	1	3.125
500 µM	3	0	0	1	0	0	0	1	30	2	6.25
750 µM	3	0	19	1	2	4	2	2	2	30	93.75
1 mM	3	0	27	0	3	1	1	0	0	32	100
10 mM	3	0	32	0	0	0	0	0	0	32	100
7dSh	3	0	0	0	0	0	0	0	31	0	0	→ stuck to lid
pH 7
Control	4	0	0	0	0	0	0	0	32	0	0
10 µM	4	0	1	0	0	0	0	0	31	1	3.125
50 µM	4	0	0	0	0	0	0	0	32	0	0
100 µM	4	0	0	0	0	0	0	0	32	0	0
250 µM	4	0	0	0	0	0	0	0	31	0	0	→ stuck to lid
500 µM	4	0	0	0	0	0	0	0	31	0	0	→ stuck to lid
750 µM	4	0	0	0	0	0	0	0	32	0	0
1 mM	4	0	0	0	0	0	0	0	31	0	0	→ stuck to lid
10 mM	4	0	0	0	0	0	0	0	32	0	0
HCl	4	0	4	3	0	0	0	4	21	11	34.375
Control	5	0	0	0	0	0	0	0	32	0	0
10 µM	5	0	0	0	0	0	0	0	32	0	0
50 µM	5	0	0	0	0	0	0	0	31	0	0	→ stuck to lid
100 µM	5	0	0	0	0	0	0	0	32	0	0
250 µM	5	0	0	0	0	0	0	0	32	0	0
500 µM	5	0	0	0	0	0	0	0	32	0	0
750 µM	5	0	0	0	0	0	0	0	32	0	0
1 mM	5	0	0	0	0	0	0	0	32	0	0
10 mM	5	0	0	0	0	0	0	0	32	0	0
HCl	5	0	0	1	0	0	0	0	31	1	3.125
Control	6	0	0	0	0	0	0	0	32	0	0
10 µM	6	0	0	0	0	0	0	0	32	0	0
50 µM	6	0	0	0	0	0	0	1	31	1	3.125
100 µM	6	0	0	0	0	0	0	0	32	0	0
250 µM	6	0	0	0	0	0	0	0	32	0	0
500 µM	6	0	0	0	0	0	0	0	32	0	0
750 µM	6	0	0	1	0	0	0	0	31	1	3.125
1 mM	6	0	0	0	0	0	0	0	32	0	0
10 mM	6	0	0	0	0	0	0	0	32	0	0
HCl	6	0	3	3	2	4	1	2	16	15	48.3871	→ stuck to lid
pH range
Treatment	Run	Timepoint [hpf]							# Individuals	Cumulative mortality
		0	12	24	48	60	72	96		#	%
K-pH7	1	0	0	0	0	0	0	0	32	0	0
K-pH3	1	32	0	0	0	0	0	0	0	32	100
G-pH3	1	32	0	0	0	0	0	0	0	32	100
K-pH4	1	0	0	0	0	0	0	0	32	0	0
G-pH4	1	0	0	0	0	0	0	0	32	0	0
K-pH5	1	0	0	0	0	0	0	0	32	0	0
G-pH5	1	0	0	0	0	0	0	0	32	0	0
K-pH6	1	0	0	0	0	0	0	0	32	0	0
G-pH6	1	0	0	0	0	0	0	0	32	0	0
K-pH8	1	0	0	0	0	0	0	0	32	0	0
G-pH8	1	0	0	0	0	0	0	0	32	0	0
K-pH7	2	0	0	0	0	0	0	0		0	0
K-pH3	2	0	0	0	0	0	0	0		0	0
G-pH3	2	0	0	0	0	0	0	0		0	0
K-pH4	2	0	0	0	0	0	0	0		0	0
G-pH4	2	0	0	0	0	0	0	0		0	0
K-pH5	2	0	0	0	0	0	0	0		0	0
G-pH5	2	0	0	0	0	0	0	0		0	0
K-pH6	2	0	0	0	0	0	0	0		0	0
G-pH6	2	0	0	0	0	0	0	0		0	0
K-pH8	2	0	0	0	0	0	0	0		0	0
G-pH8	2	0	0	0	0	0	0	0		0	0
K-pH7	3	0	0	0	0	0	0	0		0	0
K-pH3	3	0	0	0	0	0	0	0		0	0
G-pH3	3	0	0	0	0	0	0	0		0	0
K-pH4	3	0	0	0	0	0	0	0		0	0
G-pH4	3	0	0	0	0	0	0	0		0	0
K-pH5	3	0	0	0	0	0	0	0		0	0
G-pH5	3	0	0	0	0	0	0	0		0	0
K-pH6	3	0	0	0	0	0	0	0		0	0
G-pH6	3	0	0	0	0	0	0	0		0	0
K-pH8	3	0	0	0	0	0	0	0		0	0
G-pH8	3	0	0	0	0	0	0	0		0	0
Control	1	0	0	0	0	0	0	0	32	0	0
K-pH3	1	0	32	0	0	0	0	0	0	32	100
G-pH3	1	0	31	1	0	0	0	0	0	32	100
K-pH3.25	1	0	26	2	1	1	0	2	0	32	100
G-pH3.25	1	0	19	6	0	3	2	2	0	32	100
K-pH3.5	1	0	6	3	0	0	0	1	22	10	31.25
G-pH3.5	1	0	1	1	0	0	0	0	30	2	6.25
K-pH3.75	1	0	1	0	0	0	0	0	31	1	3.125
G-pH3.75	1	0	0	0	0	0	0	0	32	0	0
K-pH4	1	0	0	0	0	0	0	0	32	0	0
G-pH4	1	0	0	0	0	0	0	1	31	1	3.125
Control	2	0	0	0	0	0	0	0	32	0	0		Glyphosate only 7 replicates → n = 28
K-pH3.25	2	0	1	2	0	1	0	3	25	7	21.875
G-pH3.25	2	0	2	5	0	2	0	3	16	12	42.8571
K-pH3.35	1	0	1	1	0	0	0	8	22	10	31.25
G-pH3.35	1	0	2	1	0	1	0	0	24	4	14.2857
K-pH3.5	2	0	0	2	0	0	0	0	30	2	6.25
G-pH3.5	2	0	0	1	0	0	0	0	27	1	3.57143
K-pH3.75	2	0	0	0	0	0	0	0	32	0	0
G-pH3.75	2	0	1	0	0	0	0	0	27	1	3.57143
Control	3	0	0	0	0	0	0	0	32	0	0
K-pH3	1	0	32	0	0	0	0	0	0	32	100
G-pH3	1	0	32	0	0	0	0	0	0	32	100
K-pH3.1	1	0	31	0	1	0	0	0	0	32	100
G-pH3.1	1	0	32	0	0	0	0	0	0	32	100
K-pH3.2	1	0	19	3	5	4	1	0	0	32	100
G-pH3.2	1	0	26	3	2	1	0	0	0	32	100
K-pH3.3	1	0	7	3	0	5	3	8	6	26	81.25
G-pH3.3	1	0	14	1	0	5	0	4	8	24	75
K-pH3.4	1	0	9	0	0	0	0	11	12	20	62.5
G-pH3.4	1	0	4	1	0	0	0	0	27	5	15.625
K-pH3.5	3	0	0	1	0	1	0	0	30	2	6.25
G-pH3.5	3	0	1	0	0	0	0	1	30	2	6.25
G 1mM	1	0	28	0	2	2	0	0	0	32	100
Control	4	0	0	0	0	0	0	0	32	0	0
K-pH3	2	0	31	0	0	1	0	0	0	32	100
G-pH3	2	0	32	0	0	0	0	0	0	32	100
K-pH3.1	2	0	26	1	4	0	0	1	0	32	100
G-pH3.1	2	0	20	5	3	0	1	3	0	32	100
K-pH3.2	2	0	10	6	2	6	2	2	4	28	87.5
G-pH3.2	2	0	12	4	5	8	2	1	0	32	100
K-pH3.3	2	0	4	2	1	4	1	7	13	19	59.375
G-pH3.3	2	0	10	4	0	1	4	5	8	24	75
K-pH3.4	2	0	1	3	0	0	0	3	25	7	21.875
G-pH3.4	2	0	1	1	0	1	0	3	26	6	18.75
K-pH3.5	4	0	1	2	0	0	0	3	25	6	19.3548
G-pH3.5	4	0	1	0	0	1	1	0	29	3	9.375
G 1mM	2	0	29	1	1	1	0	0	0	32	100
Control	5	0	24	0	0	0	0	0	8	24	75
K-pH3	3	0	32	0	0	0	0	0	0	32	100
G-pH3	3	0	32	0	0	0	0	0	0	32	100
K-pH3.1	3	0	31	0	1	0	0	0	0	32	100
G-pH3.1	3	0	31	0	1	0	0	0	0	32	100
K-pH3.2	3	0	24	5	1	1	1	0	0	32	100
G-pH3.2	3	0	25	0	2	4	0	0	1	31	96.875
K-pH3.3	3	0	11	7	1	2	5	2	4	28	87.5
G-pH3.3	3	0	8	4	2	2	1	5	10	22	68.75
K-pH3.4	3	0	6	2	2	1	2	1	18	14	43.75
G-pH3.4	3	0	6	3	1	0	2	1	19	13	40.625
K-pH3.5	5	0	2	0	0	0	0	0	30	2	6.25
G-pH3.5	4	0	5	3	0	0	1	1	22	10	31.25
G 1mM	3	0	25	1	5	1	0	0	0	32	100
Control	6	0	0	0	0	0	0	0	31	0	0
K-pH3	4	0	32	0	0	0	0	0	0	32	100
G-pH3	4	0	32	0	0	0	0	0	0	32	100
K-pH3.1	4	0	31	0	1	0	0	0	0	32	100
G-pH3.1	4	0	32	0	0	0	0	0	0	32	100
K-pH3.2	4	0	24	0	3	4	1	0	0	32	100
G-pH3.2	4	0	30	0	2	0	0	0	0	32	100
K-pH3.3	4	0	12	1	1	10	0	2	6	26	81.25
G-pH3.3	4	0	12	3	4	4	0	2	7	25	78.125
K-pH3.4	4	0	2	1	1	0	2	5	21	11	34.375
G-pH3.4	4	0	3	0	2	1	2	2	22	10	31.25
K-pH3.5	6	0	1	0	1	1	0	4	25	7	21.875
G-pH3.5	6	0	1	1	1	0	3	0	26	6	18.75
G 1mM	4	0	31	1	0	0	0	0	0	32	100

## Sheet: Hatching rate
Glyphosate
Hatching rate over time
unbuffered
Treatment	Run	Time point [hpf]	Hatching [%]		Treatment	Run	Time point [hpf]	Hatching [%]		Treatment	Run	Time point [hpf]	Hatching [%]
Control	1	60	31.25		Control	2	60	9.375		Control	3	60	18.75
Control	1	72	68.75		Control	2	72	65.625		Control	3	72	68.75
Control	1	96	96.875		Control	2	96	96.875		Control	3	96	100
10 µM	1	60	31.25		10 µM	2	60	31.25		10 µM	3	60	38.7097
10 µM	1	72	81.25		10 µM	2	72	93.75		10 µM	3	72	90.3226
10 µM	1	96	96.875		10 µM	2	96	96.875		10 µM	3	96	100
50 µM	1	60	43.75		50 µM	2	60	21.875		50 µM	3	60	34.375
50 µM	1	72	100		50 µM	2	72	93.75		50 µM	3	72	90.625
50 µM	1	96	100		50 µM	2	96	96.875		50 µM	3	96	100
100 µM	1	60	50		100 µM	2	60	53.125		100 µM	3	60	25
100 µM	1	72	100		100 µM	2	72	100		100 µM	3	72	81.25
100 µM	1	96	100		100 µM	2	96	100		100 µM	3	96	100
250 µM	1	60	3.125		250 µM	2	60	10		250 µM	3	60	9.375
250 µM	1	72	6.25		250 µM	2	72	36.6667		250 µM	3	72	12.5
250 µM	1	96	9.375		250 µM	2	96	90		250 µM	3	96	22.5806
500 µM	1	60	0		500 µM	2	60	8.69565		500 µM	3	60	12.9032
500 µM	1	72	4		500 µM	2	72	39.1304		500 µM	3	72	22.5806
500 µM	1	96	5.55556		500 µM	2	96	76.1905		500 µM	3	96	40
750 µM	1	60	0		750 µM	2	60	0		750 µM	3	60	0
750 µM	1	72	11.1111		750 µM	2	72	7.69231		750 µM	3	72	0
750 µM	1	96	100	→ 1/1	750 µM	2	96	0		750 µM	3	96	0
1 mM	1	60	-		1 mM	2	60	-		1 mM	3	60	0
1 mM	1	72	-		1 mM	2	72	-		1 mM	3	72	-
1 mM	1	96	-		1 mM	2	96	-		1 mM	3	96	-
10 mM	1	60	-		10 mM	2	60	-		10 mM	3	60	-
10 mM	1	72	-		10 mM	2	72	-		10 mM	3	72	-
10 mM	1	96	-		10 mM	2	96	-		10 mM	3	96	-
7dSh	1	60	46.875		7dSh	2	60	12.5		7dSh	3	60	16.129
7dSh	1	72	93.75		7dSh	2	72	100		7dSh	3	72	83.871
7dSh	1	96	100		7dSh	2	96	100		7dSh	3	96	96.7742
pH 7
Treatment	Run	Time point [hpf]	Hatching [%]		Treatment	Run	Time point [hpf]	Hatching [%]		Treatment	Run	Time point [hpf]	Hatching [%]
Control	4	60	28.125		Control	5	60	18.75		Control	6	60	34.375
Control	4	72	50		Control	5	72	53.125		Control	6	72	56.25
Control	4	96	84.375		Control	5	96	78.125		Control	6	96	93.75
10 µM	4	60	96.875		10 µM	5	60	53.125		10 µM	6	60	78.125
10 µM	4	72	100		10 µM	5	72	100		10 µM	6	72	100
10 µM	4	96	100		10 µM	5	96	100		10 µM	6	96	100
50 µM	4	60	87.5		50 µM	5	60	22.5806		50 µM	6	60	81.25
50 µM	4	72	100		50 µM	5	72	87.0968		50 µM	6	72	96.875
50 µM	4	96	100		50 µM	5	96	100		50 µM	6	96	100
100 µM	4	60	62.5		100 µM	5	60	50		100 µM	6	60	87.5
100 µM	4	72	100		100 µM	5	72	90.625		100 µM	6	72	96.875
100 µM	4	96	100		100 µM	5	96	100		100 µM	6	96	96.875
250 µM	4	60	45.1613		250 µM	5	60	62.5		250 µM	6	60	65.625
250 µM	4	72	100		250 µM	5	72	93.75		250 µM	6	72	100
250 µM	4	96	100		250 µM	5	96	100		250 µM	6	96	100
500 µM	4	60	29.0323		500 µM	5	60	59.375		500 µM	6	60	75
500 µM	4	72	96.7742		500 µM	5	72	100		500 µM	6	72	100
500 µM	4	96	100		500 µM	5	96	100		500 µM	6	96	100
750 µM	4	60	50		750 µM	5	60	59.375		750 µM	6	60	90.3226
750 µM	4	72	100		750 µM	5	72	96.875		750 µM	6	72	96.7742
750 µM	4	96	100		750 µM	5	96	100		750 µM	6	96	100
1 mM	4	60	90.3226		1 mM	5	60	81.25		1 mM	6	60	53.125
1 mM	4	72	100		1 mM	5	72	93.75		1 mM	6	72	100
1 mM	4	96	100		1 mM	5	96	96.875		1 mM	6	96	100
10 mM	4	60	25		10 mM	5	60	53.125		10 mM	6	60	43.75
10 mM	4	72	87.5		10 mM	5	72	93.75		10 mM	6	72	81.25
10 mM	4	96	96.875		10 mM	5	96	96.875		10 mM	6	96	90.625
HCl	4	60	4.16667		HCl	5	60	16.129		HCl	6	60	26.3158
HCl	4	72	29.1667		HCl	5	72	32.2581		HCl	6	72	44.4444
HCl	4	96	25		HCl	5	96	48.3871		HCl	6	96	34.6154
pH range
Treatment	Run	Time point [hpf]	Hatching [%]
K-pH7	1	60	34.375
K-pH7	1	72	68.75
K-pH7	1	96	87.5
K-pH3	1	60	-
K-pH3	1	72	-
K-pH3	1	96	-
G-pH3	1	60	-
G-pH3	1	72	-
G-pH3	1	96	-
K-pH4	1	60	75
K-pH4	1	72	90.625
K-pH4	1	96	93.75
G-pH4	1	60	62.5
G-pH4	1	72	84.375
G-pH4	1	96	84.375
K-pH5	1	60	18.75
K-pH5	1	72	62.5
K-pH5	1	96	100
G-pH5	1	60	37.5
G-pH5	1	72	96.875
G-pH5	1	96	100
K-pH6	1	60	34.375
K-pH6	1	72	75
K-pH6	1	96	90.625
G-pH6	1	60	37.5
G-pH6	1	72	100
G-pH6	1	96	100
K-pH8	1	60	25
K-pH8	1	72	59.375
K-pH8	1	96	93.75
G-pH8	1	60	40.625
G-pH8	1	72	93.75
G-pH8	1	96	100
Treatment	Run	Time point [hpf]	Hatching [%]		Treatment	Run	Time point [hpf]	Hatching [%]		Treatment	Run	Time point [hpf]	Hatching [%]		Treatment	Run	Time point [hpf]	Hatching [%]		Treatment	Run	Time point [hpf]	Hatching [%]		Treatment	Run	Time point [hpf]	Hatching [%]
Control	1	60	6.25		Control	2	60	46.875		Control	3	60	34.375		Control	4	60	37.5		Control	5	60	15.625		Control	6	60	41.9355
Control	1	72	78.125		Control	2	72	81.25		Control	3	72	96.875		Control	4	72	75		Control	5	72	68.75		Control	6	72	74.1935
Control	1	96	93.75		Control	2	96	93.75		Control	3	96	100		Control	4	96	84.375		Control	5	96	93.75		Control	6	96	90.3226
K-pH3	1	60	-		K-pH3.25	2	60	0		K-pH3	1	60	-		K-pH3	2	60	-		K-pH3	3	60	-		K-pH3	4	60	-
K-pH3	1	72	-		K-pH3.25	2	72	7.14286		K-pH3	1	72	-		K-pH3	2	72	-		K-pH3	3	72	-		K-pH3	4	72	-
K-pH3	1	96	-		K-pH3.25	2	96	16		K-pH3	1	96	-		K-pH3	2	96	-		K-pH3	3	96	-		K-pH3	4	96	-
G-pH3	1	60	-		G-pH3.25	2	60	5.26316		G-pH3	1	60	-		G-pH3	2	60	-		G-pH3	3	60	-		G-pH3	4	60	-
G-pH3	1	72	-		G-pH3.25	2	72	21.7391		G-pH3	1	72	-		G-pH3	2	72	-		G-pH3	3	72	-		G-pH3	4	72	-
G-pH3	1	96	-		G-pH3.25	2	96	25		G-pH3	1	96	-		G-pH3	2	96	-		G-pH3	3	96	-		G-pH3	4	96	-
K-pH3.25	1	60	0		K-pH3.35	1	60	0		K-pH3.1	1	60	-		K-pH3.1	2	60	0		K-pH3.1	3	60	-		K-pH3.1	4	60	-
K-pH3.25	1	72	0		K-pH3.35	1	72	6.66667		K-pH3.1	1	72	-		K-pH3.1	2	72	0		K-pH3.1	3	72	-		K-pH3.1	4	72	-
K-pH3.25	1	96	-		K-pH3.35	1	96	22.7273		K-pH3.1	1	96	-		K-pH3.1	2	96	-		K-pH3.1	3	96	-		K-pH3.1	4	96	-
G-pH3.25	1	60	0		G-pH3.35	1	60	9.09091		G-pH3.1	1	60	-		G-pH3.1	2	60	0		G-pH3.1	3	60	-		G-pH3.1	4	60	-
G-pH3.25	1	72	0		G-pH3.35	1	72	16.6667		G-pH3.1	1	72	-		G-pH3.1	2	72	0		G-pH3.1	3	72	-		G-pH3.1	4	72	-
G-pH3.25	1	96	-		G-pH3.35	1	96	25		G-pH3.1	1	96	-		G-pH3.1	2	96	-		G-pH3.1	3	96	-		G-pH3.1	4	96	-
K-pH3.5	1	60	8.69565		K-pH3.5	2	60	3.33333		K-pH3.2	1	60	0		K-pH3.2	2	60	11.1111		K-pH3.2	3	60	0		K-pH3.2	4	60	-
K-pH3.5	1	72	13.0435		K-pH3.5	2	72	26.6667		K-pH3.2	1	72	-		K-pH3.2	2	72	28.5714		K-pH3.2	3	72	0		K-pH3.2	4	72	-
K-pH3.5	1	96	13.6364		K-pH3.5	2	96	30		K-pH3.2	1	96	-		K-pH3.2	2	96	60		K-pH3.2	3	96	-		K-pH3.2	4	96	-
G-pH3.5	1	60	16.6667		G-pH3.5	2	60	11.1111		G-pH3.2	1	60	-		G-pH3.2	2	60	0		G-pH3.2	3	60	0		G-pH3.2	4	60	-
G-pH3.5	1	72	23.3333		G-pH3.5	2	72	25.9259		G-pH3.2	1	72	-		G-pH3.2	2	72	0		G-pH3.2	3	72	100		G-pH3.2	4	72	-
G-pH3.5	1	96	26.6667		G-pH3.5	2	96	55.5556		G-pH3.2	1	96	-		G-pH3.2	2	96	-		G-pH3.2	3	96	-		G-pH3.2	4	96	-
K-pH3.75	1	60	0		K-pH3.75	2	60	25		K-pH3.3	1	60	5.88235		K-pH3.3	2	60	0		K-pH3.3	3	60	0		K-pH3.3	4	60	0
K-pH3.75	1	72	3.22581		K-pH3.75	2	72	46.875		K-pH3.3	1	72	35.7143		K-pH3.3	2	72	0		K-pH3.3	3	72	16.6667		K-pH3.3	4	72	12.5
K-pH3.75	1	96	16.129		K-pH3.75	2	96	65.625		K-pH3.3	1	96	50		K-pH3.3	2	96	28.5714		K-pH3.3	3	96	50		K-pH3.3	4	96	83.3333
G-pH3.75	1	60	0		G-pH3.75	2	60	51.8519		G-pH3.3	1	60	0		G-pH3.3	2	60	0		G-pH3.3	3	60	0		G-pH3.3	4	60	0
G-pH3.75	1	72	9.375		G-pH3.75	2	72	62.963		G-pH3.3	1	72	8.33333		G-pH3.3	2	72	7.14286		G-pH3.3	3	72	46.6667		G-pH3.3	4	72	100
G-pH3.75	1	96	18.75		G-pH3.75	2	96	85.1852		G-pH3.3	1	96	75		G-pH3.3	2	96	77.7778		G-pH3.3	3	96	90		G-pH3.3	4	96	100
K-pH4	1	60	18.75							K-pH3.4	1	60	0		K-pH3.4	2	60	0		K-pH3.4	3	60	0		K-pH3.4	4	60	3.57143
K-pH4	1	72	46.875							K-pH3.4	1	72	4.34783		K-pH3.4	2	72	0		K-pH3.4	3	72	31.5789		K-pH3.4	4	72	19.2308
K-pH4	1	96	65.625							K-pH3.4	1	96	50		K-pH3.4	2	96	7.69231		K-pH3.4	3	96	83.3333		K-pH3.4	4	96	100
G-pH4	1	60	37.5							G-pH3.4	1	60	3.84615		G-pH3.4	2	60	0		G-pH3.4	3	60	4.54545		G-pH3.4	4	60	4
G-pH4	1	72	68.75							G-pH3.4	1	72	15.3846		G-pH3.4	2	72	0		G-pH3.4	3	72	30		G-pH3.4	4	72	43.4783
G-pH4	1	96	80.6452							G-pH3.4	1	96	61.5385		G-pH3.4	2	96	26.9231		G-pH3.4	3	96	63.1579		G-pH3.4	4	96	57.1429
										K-pH3.5	3	60	10		K-pH3.5	4	60	0		K-pH3.5	5	60	0		K-pH3.5	6	60	0
										K-pH3.5	3	72	23.3333		K-pH3.5	4	72	0		K-pH3.5	5	72	0		K-pH3.5	6	72	0
										K-pH3.5	3	96	43.3333		K-pH3.5	4	96	12		K-pH3.5	5	96	0		K-pH3.5	6	96	4
										G-pH3.5	3	60	3.22581		G-pH3.5	4	60	0		G-pH3.5	5	60	0		G-pH3.5	6	60	0
										G-pH3.5	3	72	16.129		G-pH3.5	4	72	13.7931		G-pH3.5	5	72	34.7826		G-pH3.5	6	72	7.69231
										G-pH3.5	3	96	70		G-pH3.5	4	96	65.5172		G-pH3.5	5	96	68.1818		G-pH3.5	6	96	61.5385
										G 1mM	1	60	-		G 1mM	2	60	-		G 1mM	3	60	-		G 1mM	4	60	-
										G 1mM	1	72	-		G 1mM	2	72	-		G 1mM	3	72	-		G 1mM	4	72	-
										G 1mM	1	96	-		G 1mM	2	96	-		G 1mM	3	96	-		G 1mM	4	96	-

## Sheet: Heart rate
Glyphosate
Heart rate at 48 hpf
unbuffered
Treatment	Run	Heart rate [beats/min]	Mean	SD			Treatment	Run	Heart rate [beats/min]	Mean	SD			Treatment	Run	Heart rate [beats/min]	Mean	SD
Control	1	139.5	143.625	8.48528			Control	2	157.5	152.438	5.66592			Control	3	150	150.188	5.75039
Control	1	132					Control	2	159					Control	3	153
Control	1	145.5					Control	2	156					Control	3	156
Control	1	153					Control	2	144					Control	3	157.5
Control	1	141					Control	2	156					Control	3	150
Control	1	139.5					Control	2	153					Control	3	145.5
Control	1	145.5					Control	2	147					Control	3	139.5
Control	1	153					Control	2	147					Control	3	150
10 µM	1	142.5	137.062	5.13001			10 µM	2	144	142.875	4.51782			10 µM	3	136.5	135.188	7.75029
10 µM	1	139.5					10 µM	2	144					10 µM	3	147
10 µM	1	132					10 µM	2	145.5					10 µM	3	127.5
10 µM	1	142.5					10 µM	2	133.5					10 µM	3	142.5
10 µM	1	133.5					10 µM	2	141					10 µM	3	123
10 µM	1	136.5					10 µM	2	148.5					10 µM	3	132
10 µM	1	141					10 µM	2	141					10 µM	3	138
10 µM	1	129					10 µM	2	145.5					10 µM	3	135
50 µM	1	124.5	133.875	5.96238			50 µM	2	142.5	135.375	8.28402			50 µM	3	139.5	133.312	7.41108
50 µM	1	133.5					50 µM	2	133.5					50 µM	3	141
50 µM	1	136.5					50 µM	2	145.5					50 µM	3	120
50 µM	1	142.5					50 µM	2	138					50 µM	3	130.5
50 µM	1	133.5					50 µM	2	139.5					50 µM	3	139.5
50 µM	1	138					50 µM	2	132					50 µM	3	136.5
50 µM	1	139.5					50 µM	2	118.5					50 µM	3	133.5
50 µM	1	123					50 µM	2	133.5					50 µM	3	126
100 µM	1	117	128.062	9.65267			100 µM	2	126	128.438	8.29129			100 µM	3	132	129.562	10.1715
100 µM	1	115.5					100 µM	2	126					100 µM	3	150
100 µM	1	133.5					100 µM	2	130.5					100 µM	3	120
100 µM	1	135					100 µM	2	114					100 µM	3	118.5
100 µM	1	141					100 µM	2	139.5					100 µM	3	121.5
100 µM	1	136.5					100 µM	2	135					100 µM	3	132
100 µM	1	121.5					100 µM	2	135					100 µM	3	129
100 µM	1	124.5					100 µM	2	121.5					100 µM	3	133.5
250 µM	1	124.5	123.562	4.67086			250 µM	2	121.5	124.5	3			250 µM	3	111	128.625	8.95525
250 µM	1	120					250 µM	2	127.5					250 µM	3	127.5
250 µM	1	127.5					250 µM	2	120					250 µM	3	127.5
250 µM	1	121.5					250 µM	2	126					250 µM	3	124.5
250 µM	1	120					250 µM	2	127.5					250 µM	3	139.5
250 µM	1	117					250 µM	2	127.5					250 µM	3	138
250 µM	1	130.5					250 µM	2	123					250 µM	3	133.5
250 µM	1	127.5					250 µM	2	123					250 µM	3	127.5
500 µM	1	129	120.938	8.89221			500 µM	2	124.5	119.438	7.47585			500 µM	3	114	115.5	5.55492
500 µM	1	112.5					500 µM	2	123					500 µM	3	112.5
500 µM	1	129					500 µM	2	126					500 µM	3	126
500 µM	1	105					500 µM	2	129					500 µM	3	109.5
500 µM	1	123					500 µM	2	112.5					500 µM	3	117
500 µM	1	118.5					500 µM	2	111					500 µM	3	120
500 µM	1	124.5					500 µM	2	109.5					500 µM	3	109.5
500 µM	1	126					500 µM	2	120					500 µM	3	115.5
750 µM	1	-	111.143	13.9245			750 µM	2	-	113.357	7.9305			750 µM	3	90	113.143	12.2124
750 µM	1	84					750 µM	2	109.5					750 µM	3	105
750 µM	1	111					750 µM	2	99					750 µM	3	123
750 µM	1	130.5					750 µM	2	112.5					750 µM	3	123
750 µM	1	115					750 µM	2	124.5					750 µM	3	114
750 µM	1	114					750 µM	2	114					750 µM	3	123
750 µM	1	108					750 µM	2	115.5					750 µM	3	114
750 µM	1	115.5					750 µM	2	118.5					750 µM	3	-
1 mM	1	-	#DIV/0!	#DIV/0!			1 mM	2	-	#DIV/0!	#DIV/0!			1 mM	3	96	94.5	2.12132
1 mM	1	-					1 mM	2	-					1 mM	3	-
1 mM	1	-					1 mM	2	-					1 mM	3	-
1 mM	1	-					1 mM	2	-					1 mM	3	-
1 mM	1	-					1 mM	2	-					1 mM	3	93
1 mM	1	-					1 mM	2	-					1 mM	3	-
1 mM	1	-					1 mM	2	-					1 mM	3	-
1 mM	1	-					1 mM	2	-					1 mM	3	-
10 mM	1	-	#DIV/0!	#DIV/0!			10 mM	2	-	#DIV/0!	#DIV/0!			10 mM	3	-	#DIV/0!	#DIV/0!
10 mM	1	-					10 mM	2	-					10 mM	3	-
10 mM	1	-					10 mM	2	-					10 mM	3	-
10 mM	1	-					10 mM	2	-					10 mM	3	-
10 mM	1	-					10 mM	2	-					10 mM	3	-
10 mM	1	-					10 mM	2	-					10 mM	3	-
10 mM	1	-					10 mM	2	-					10 mM	3	-
10 mM	1	-					10 mM	2	-					10 mM	3	-
7dSh	1	151.5	143.812	5.52228			7dSh	2	142.5	140.438	4.16137			7dSh	3	148.5	135	7.5214
7dSh	1	138					7dSh	2	144					7dSh	3	136.5
7dSh	1	145.5					7dSh	2	144					7dSh	3	141
7dSh	1	135					7dSh	2	139.5					7dSh	3	127.5
7dSh	1	148.5					7dSh	2	144					7dSh	3	130.5
7dSh	1	144					7dSh	2	138					7dSh	3	138
7dSh	1	141					7dSh	2	132					7dSh	3	126
7dSh	1	147					7dSh	2	139.5					7dSh	3	132
pH 7
Treatment	Run	Heart rate [beats/min]	Mean	SD			Treatment	Run	Heart rate [beats/min]	Mean	SD			Treatment	Run	Heart rate [beats/min]	Mean	SD
Control	4	144	153.375	5.87823			Control	5	136.5	147.188	5.86112			Control	6	144	143.562	10.4555
Control	4	159					Control	5	150					Control	6	127.5
Control	4	154.5					Control	5	153					Control	6	156
Control	4	147					Control	5	144					Control	6	129
Control	4	157.5					Control	5	145.5					Control	6	147
Control	4	160.5					Control	5	150					Control	6	146.5
Control	4	150					Control	5	154.5					Control	6	154.5
Control	4	154.5					Control	5	144					Control	6	144
10 µM	4	148.5	146.625	4.92624			10 µM	5	156	147.75	6.80336			10 µM	6	156	138.375	8.00781
10 µM	4	157.5					10 µM	5	151.5					10 µM	6	139.5
10 µM	4	147					10 µM	5	142.5					10 µM	6	133.5
10 µM	4	145.5					10 µM	5	145.5					10 µM	6	138
10 µM	4	141					10 µM	5	159					10 µM	6	129
10 µM	4	144					10 µM	5	142.5					10 µM	6	133.5
10 µM	4	144					10 µM	5	142.5					10 µM	6	138
10 µM	4	145.5					10 µM	5	142.5					10 µM	6	139.5
50 µM	4	141	142.688	3.71231			50 µM	5	148.5	146.438	4.0039			50 µM	6	139.5	138.562	9.13954
50 µM	4	141					50 µM	5	147					50 µM	6	126
50 µM	4	139.5					50 µM	5	145.5					50 µM	6	145.5
50 µM	4	139.5					50 µM	5	141					50 µM	6	145.5
50 µM	4	148.5					50 µM	5	142.5					50 µM	6	136.5
50 µM	4	142.5					50 µM	5	144					50 µM	6	153
50 µM	4	148.5					50 µM	5	153					50 µM	6	133.5
50 µM	4	141					50 µM	5	150					50 µM	6	129
100 µM	4	150	141.938	7.21327			100 µM	5	118.5	132.188	13.3067			100 µM	6	127.5	135.562	7.81225
100 µM	4	135					100 µM	5	141					100 µM	6	144
100 µM	4	133.5					100 µM	5	118.5					100 µM	6	130.5
100 µM	4	150					100 µM	5	141					100 µM	6	129
100 µM	4	150					100 µM	5	144					100 µM	6	136.5
100 µM	4	141					100 µM	5	150					100 µM	6	135
100 µM	4	135					100 µM	5	127.5					100 µM	6	132
100 µM	4	141					100 µM	5	117					100 µM	6	150
250 µM	4	129	127.125	5.54044			250 µM	5	127.5	127.688	7.66689			250 µM	6	147	136.125	9.47836
250 µM	4	123					250 µM	5	120					250 µM	6	142.5
250 µM	4	133.5					250 µM	5	123					250 µM	6	136.5
250 µM	4	117					250 µM	5	138					250 µM	6	129
250 µM	4	133.5					250 µM	5	130.5					250 µM	6	124.5
250 µM	4	129					250 µM	5	115.5					250 µM	6	123
250 µM	4	127.5					250 µM	5	133.5					250 µM	6	141
250 µM	4	124.5					250 µM	5	133.5					250 µM	6	145.5
500 µM	4	126	130.5	2.77746			500 µM	5	136.5	134.625	9.41029			500 µM	6	121.5	122.438	11.478
500 µM	4	133.5					500 µM	5	147					500 µM	6	145.5
500 µM	4	132					500 µM	5	142.5					500 µM	6	133.5
500 µM	4	129					500 µM	5	136.5					500 µM	6	121.5
500 µM	4	132					500 µM	5	121.5					500 µM	6	114
500 µM	4	130.5					500 µM	5	135					500 µM	6	115.5
500 µM	4	133.5					500 µM	5	120					500 µM	6	115.5
500 µM	4	127.5					500 µM	5	138					500 µM	6	112.5
750 µM	4	133.5	136.125	5.71183			750 µM	5	133.5	148.5	11.4798			750 µM	6	121.5	115.875	12.0468
750 µM	4	127.5					750 µM	5	148.5					750 µM	6	99
750 µM	4	138					750 µM	5	151.5					750 µM	6	109.5
750 µM	4	138					750 µM	5	132					750 µM	6	135
750 µM	4	144					750 µM	5	160.5					750 µM	6	109.5
750 µM	4	129					750 µM	5	165					750 µM	6	105
750 µM	4	141					750 µM	5	148.5					750 µM	6	126
750 µM	4	138					750 µM	5	148.5					750 µM	6	121.5
1 mM	4	154.5	141.75	8.81962			1 mM	5	144	145.5	7.89665			1 mM	6	144	150.562	5.77827
1 mM	4	145.5					1 mM	5	141					1 mM	6	148.5
1 mM	4	130.5					1 mM	5	142.5					1 mM	6	142.5
1 mM	4	139.5					1 mM	5	163.5					1 mM	6	156
1 mM	4	147					1 mM	5	139.5					1 mM	6	154.5
1 mM	4	132					1 mM	5	148.5					1 mM	6	159
1 mM	4	150					1 mM	5	139.5					1 mM	6	151.5
1 mM	4	135					1 mM	5	145.5					1 mM	6	148.5
10 mM	4	156	146.062	8.01533			10 mM	5	153	155.438	6.6571			10 mM	6	147	146.625	5.24234
10 mM	4	151.5					10 mM	5	168					10 mM	6	147
10 mM	4	132					10 mM	5	148.5					10 mM	6	139.5
10 mM	4	136.5					10 mM	5	153					10 mM	6	157.5
10 mM	4	147					10 mM	5	156					10 mM	6	145.5
10 mM	4	145.5					10 mM	5	162					10 mM	6	142.5
10 mM	4	150					10 mM	5	154.5					10 mM	6	145.5
10 mM	4	150					10 mM	5	148.5					10 mM	6	148.5
HCl	4	136.5	131.625	7.20491			HCl	5	141	135.375	5.36357			HCl	6	126	130.125	6.04004
HCl	4	135					HCl	5	132					HCl	6	135
HCl	4	124.5					HCl	5	142.5					HCl	6	121.5
HCl	4	136.5					HCl	5	132					HCl	6	129
HCl	4	121.5					HCl	5	141					HCl	6	135
HCl	4	126					HCl	5	129					HCl	6	136.5
HCl	4	130.5					HCl	5	130.5					HCl	6	135
HCl	4	142.5					HCl	5	135					HCl	6	123
pH range
Treatment	Run	Heart rate [beats/min]	Mean	SD
K-pH7	1	139.5	143.625	5.59815
K-pH7	1	147
K-pH7	1	144
K-pH7	1	144
K-pH7	1	145.5
K-pH7	1	147
K-pH7	1	150
K-pH3	1	132
K-pH3	1	-	-	-
K-pH3	1	-
K-pH3	1	-
K-pH3	1	-
K-pH3	1	-
K-pH3	1	-
K-pH3	1	-
K-pH3	1	-
G-pH3	1	-	-	-
G-pH3	1	-
G-pH3	1	-
G-pH3	1	-
G-pH3	1	-
G-pH3	1	-
G-pH3	1	-
G-pH3	1	-
K-pH4	1	142.5	148.312	5.69422
K-pH4	1	148.5
K-pH4	1	159
K-pH4	1	144
K-pH4	1	147
K-pH4	1	150
K-pH4	1	153
K-pH4	1	142.5
G-pH4	1	163.5	147.375	7.80453
G-pH4	1	145.5
G-pH4	1	136.5
G-pH4	1	148.5
G-pH4	1	147
G-pH4	1	148.5
G-pH4	1	141
G-pH4	1	148.5
K-pH5	1	139.5	139.5	7.43544
K-pH5	1	135
K-pH5	1	142.5
K-pH5	1	148.5
K-pH5	1	151.5
K-pH5	1	132
K-pH5	1	132
K-pH5	1	135
G-pH5	1	151.5	151.312	3.62469
G-pH5	1	151.5
G-pH5	1	150
G-pH5	1	147
G-pH5	1	153
G-pH5	1	159
G-pH5	1	148.5
G-pH5	1	150
K-pH6	1	148.5	139.688	7.95495
K-pH6	1	141
K-pH6	1	148.5
K-pH6	1	126
K-pH6	1	138
K-pH6	1	138
K-pH6	1	132
K-pH6	1	145.5
G-pH6	1	153	157.125	4.79397
G-pH6	1	156
G-pH6	1	165
G-pH6	1	156
G-pH6	1	156
G-pH6	1	150
G-pH6	1	162
G-pH6	1	159
K-pH8	1	147	148.688	3.79791
K-pH8	1	148.5
K-pH8	1	144
K-pH8	1	148.5
K-pH8	1	144
K-pH8	1	153
K-pH8	1	154.5
K-pH8	1	150
G-pH8	1	147	148.875	4.06861
G-pH8	1	150
G-pH8	1	147
G-pH8	1	154.5
G-pH8	1	154.5
G-pH8	1	142.5
G-pH8	1	148.5
G-pH8	1	147
Treatment	Run	Heart rate [beats/min]	Mean	SD			Treatment	Run	Heart rate [beats/min]	Mean	SD			Treatment	Run	Heart rate [beats/min]	Mean	SD			Treatment	Run	Heart rate [beats/min]	Mean	SD			Treatment	Run	Heart rate [beats/min]	Mean	SD				Treatment	Run	Heart rate [beats/min]	Mean	SD
																																	SA
Control	1	145.5	157.125	7.46779			Control	2	156.5	159.25	6.45313			Control	3	160.5	160.875	4.29909			Control	4	148.5	156.75	9			Control	1	5	169.5	159	6.94365			Control	6	162	161.25	8.25487
Control	1	150					Control	2	154.5					Control	3	165					Control	4	174					Control	2	5	156					Control	6	159
Control	1	156					Control	2	159					Control	3	157.5					Control	4	160.5					Control	3	5	163.5					Control	6	165
Control	1	163.5					Control	2	174					Control	3	160.5					Control	4	163.5					Control	4	5	157.5					Control	6	148.5
Control	1	159					Control	2	156					Control	3	154.5					Control	4	148.5					Control	5	5	166.5					Control	6	172.5
Control	1	153					Control	2	157.5					Control	3	157.5					Control	4	150					Control	6	5	150					Control	6	171
Control	1	168					Control	2	154.5					Control	3	166.5					Control	4	151.5					Control	7	5	151.5					Control	6	159
Control	1	162					Control	2	162					Control	3	165					Control	4	157.5					Control	8	5	157.5					Control	6	153
K-pH3	1	-	#DIV/0!	#DIV/0!			K-pH3.25	2	132	141	10.6066			K-pH3	1	-	#DIV/0!	#DIV/0!			K-pH3	2	-	96	#DIV/0!			K-pH3	1	3	-	#DIV/0!	#DIV/0!			K-pH3	4	-	#DIV/0!	#DIV/0!
K-pH3	1	-					K-pH3.25	2	132					K-pH3	1	-					K-pH3	2	-					K-pH3	2	3	-					K-pH3	4	-
K-pH3	1	-					K-pH3.25	2	139.5					K-pH3	1	-					K-pH3	2	-					K-pH3	3	3	-					K-pH3	4	-
K-pH3	1	-					K-pH3.25	2	127.5					K-pH3	1	-					K-pH3	2	-					K-pH3	4	3	-					K-pH3	4	-
K-pH3	1	-					K-pH3.25	2	148.5					K-pH3	1	-					K-pH3	2	-					K-pH3	5	3	-					K-pH3	4	-
K-pH3	1	-					K-pH3.25	2	139.5					K-pH3	1	-					K-pH3	2	96					K-pH3	6	3	-					K-pH3	4	-
K-pH3	1	-					K-pH3.25	2	157.5					K-pH3	1	-					K-pH3	2	-					K-pH3	7	3	-					K-pH3	4	-
K-pH3	1	-					K-pH3.25	2	151.5					K-pH3	1	-					K-pH3	2	-					K-pH3	8	3	-					K-pH3	4	-
G-pH3	1	-	#DIV/0!	#DIV/0!			G-pH3.25	2	148.5	150.214	4.53557			G-pH3	1	-	#DIV/0!	#DIV/0!			G-pH3	2	-	#DIV/0!	#DIV/0!			G-pH3	1	3	-	#DIV/0!	#DIV/0!			G-pH3	4	-	#DIV/0!	#DIV/0!
G-pH3	1	-					G-pH3.25	2	159					G-pH3	1	-					G-pH3	2	-					G-pH3	2	3	-					G-pH3	4	-
G-pH3	1	-					G-pH3.25	2	153					G-pH3	1	-					G-pH3	2	-					G-pH3	3	3	-					G-pH3	4	-
G-pH3	1	-					G-pH3.25	2	148.5					G-pH3	1	-					G-pH3	2	-					G-pH3	4	3	-					G-pH3	4	-
G-pH3	1	-					G-pH3.25	2	150					G-pH3	1	-					G-pH3	2	-					G-pH3	5	3	-					G-pH3	4	-
G-pH3	1	-					G-pH3.25	2	145.5					G-pH3	1	-					G-pH3	2	-					G-pH3	6	3	-					G-pH3	4	-
G-pH3	1	-					G-pH3.25	2	147					G-pH3	1	-					G-pH3	2	-					G-pH3	7	3	-					G-pH3	4	-
G-pH3	1	-					K-pH3.35	1	147	136.5	5.25765			G-pH3	1	-					G-pH3	2	-					G-pH3	8	3	-					G-pH3	4	-
K-pH3.25	1	156	148	9.16515			K-pH3.35	1	129					K-pH3.1	1	-	#DIV/0!	#DIV/0!			K-pH3.1	2	-	135	#DIV/0!			K-pH3.1	1	3	-	#DIV/0!	#DIV/0!			K-pH3.1	4	-	#DIV/0!	#DIV/0!
K-pH3.25	1	-					K-pH3.35	1	135					K-pH3.1	1	-					K-pH3.1	2	-					K-pH3.1	2	3	-					K-pH3.1	4	-
K-pH3.25	1	150					K-pH3.35	1	139.5					K-pH3.1	1	-					K-pH3.1	2	-					K-pH3.1	3	3	-					K-pH3.1	4	-
K-pH3.25	1	-					K-pH3.35	1	135					K-pH3.1	1	-					K-pH3.1	2	-					K-pH3.1	4	3	-					K-pH3.1	4	-
K-pH3.25	1	138					K-pH3.35	1	135					K-pH3.1	1	-					K-pH3.1	2	-					K-pH3.1	5	3	-					K-pH3.1	4	-
K-pH3.25	1	-					K-pH3.35	1	133.5					K-pH3.1	1	-					K-pH3.1	2	-					K-pH3.1	6	3	-					K-pH3.1	4	-
K-pH3.25	1	-					K-pH3.35	1	138					K-pH3.1	1	-					K-pH3.1	2	-					K-pH3.1	7	3	-					K-pH3.1	4	-
K-pH3.25	1	-					G-pH3.35	1	156	144	9.3675			K-pH3.1	1	-					K-pH3.1	2	135					K-pH3.1	8	3	-					K-pH3.1	4	-
G-pH3.25	1	-	137.75	6.7361			G-pH3.35	1	151.5					G-pH3.1	1	-	#DIV/0!	#DIV/0!			G-pH3.1	2	-	134.5	4.82183			G-pH3.1	1	3	-	#DIV/0!	#DIV/0!			G-pH3.1	4	-	#DIV/0!	#DIV/0!
G-pH3.25	1	129					G-pH3.35	1	148.5					G-pH3.1	1	-					G-pH3.1	2	-					G-pH3.1	2	3	-					G-pH3.1	4	-
G-pH3.25	1	147					G-pH3.35	1	147					G-pH3.1	1	-					G-pH3.1	2	-					G-pH3.1	3	3	-					G-pH3.1	4	-
G-pH3.25	1	135					G-pH3.35	1	132					G-pH3.1	1	-					G-pH3.1	2	-					G-pH3.1	4	3	-					G-pH3.1	4	-
G-pH3.25	1	-					G-pH3.35	1	132					G-pH3.1	1	-					G-pH3.1	2	-					G-pH3.1	5	3	-					G-pH3.1	4	-
G-pH3.25	1	144					G-pH3.35	1	141					G-pH3.1	1	-					G-pH3.1	2	136.5					G-pH3.1	6	3	-					G-pH3.1	4	-
G-pH3.25	1	133.5					K-pH3.5	2	148.5	144.562	5.19228			G-pH3.1	1	-					G-pH3.1	2	129					G-pH3.1	7	3	-					G-pH3.1	4	-
G-pH3.25	1	138					K-pH3.5	2	151.5					G-pH3.1	1	-					G-pH3.1	2	138					G-pH3.1	8	3	-					G-pH3.1	4	-
K-pH3.5	1	159	151.312	5.75039			K-pH3.5	2	142.5					K-pH3.2	1	90	119.25	27.3176			K-pH3.2	2	133.5	128.875	9.27266			K-pH3.2	1	3	-	129	0			K-pH3.2	4	-	135.375	10.7034
K-pH3.5	1	154.5					K-pH3.5	2	139.5					K-pH3.2	1	-					K-pH3.2	2	117					K-pH3.2	2	3	-					K-pH3.2	4	120
K-pH3.5	1	147					K-pH3.5	2	136.5					K-pH3.2	1	-					K-pH3.2	2	112.5					K-pH3.2	3	3	-					K-pH3.2	4	144
K-pH3.5	1	156					K-pH3.5	2	144					K-pH3.2	1	-					K-pH3.2	2	132					K-pH3.2	4	3	-					K-pH3.2	4	136.5
K-pH3.5	1	151.5					K-pH3.5	2	150					K-pH3.2	1	144					K-pH3.2	2	127.5					K-pH3.2	5	3	-					K-pH3.2	4	-
K-pH3.5	1	142.5					K-pH3.5	2	144					K-pH3.2	1	141					K-pH3.2	2	136					K-pH3.2	6	3	129					K-pH3.2	4	141
K-pH3.5	1	154.5					G-pH3.5	2	138	146.786	9.85248			K-pH3.2	1	-					K-pH3.2	2	136.5					K-pH3.2	7	3	129					K-pH3.2	4	-
K-pH3.5	1	145.5					G-pH3.5	2	160.5					K-pH3.2	1	102					K-pH3.2	2	136					K-pH3.2	8	3	-					K-pH3.2	4	-
G-pH3.5	1	156	158.625	8.58882			G-pH3.5	2	141					G-pH3.2	1	-	117	#DIV/0!			G-pH3.2	2	126	134.625	7.3812			G-pH3.2	1	3	-	131.625	8.86355			G-pH3.2	4	-	#DIV/0!	#DIV/0!
G-pH3.5	1	169.5					G-pH3.5	2	156					G-pH3.2	1	117					G-pH3.2	2	144					G-pH3.2	2	3	-					G-pH3.2	4	-
G-pH3.5	1	165					G-pH3.5	2	154.5					G-pH3.2	1	-					G-pH3.2	2	127.5					G-pH3.2	3	3	124.5					G-pH3.2	4	-
G-pH3.5	1	165					G-pH3.5	2	141					G-pH3.2	1	-					G-pH3.2	2	145.5					G-pH3.2	4	3	126					G-pH3.2	4	-
G-pH3.5	1	165					G-pH3.5	2	136.5					G-pH3.2	1	-					G-pH3.2	2	135					G-pH3.2	5	3	-					G-pH3.2	4	-
G-pH3.5	1	147					K-pH3.75	2	150.5	149.125	5.62361			G-pH3.2	1	-					G-pH3.2	2	129					G-pH3.2	6	3	-					G-pH3.2	4	-
G-pH3.5	1	148.5					K-pH3.75	2	159					G-pH3.2	1	-					G-pH3.2	2	132					G-pH3.2	7	3	132					G-pH3.2	4	-
G-pH3.5	1	153					K-pH3.75	2	153					G-pH3.2	1	-					G-pH3.2	2	138					G-pH3.2	8	3	144					G-pH3.2	4	-
K-pH3.75	1	136.5	145.312	9.05119			K-pH3.75	2	147					K-pH3.3	1	139.5	133.25	13.7347			K-pH3.3	2	132	127.375	9.57209			K-pH3.3	1	3	129	150.812	13.0656			K-pH3.3	4	138	136.5	4.94253
K-pH3.75	1	145.5					K-pH3.75	2	139.5					K-pH3.3	1	135					K-pH3.3	2	136.5					K-pH3.3	2	3	141					K-pH3.3	4	136.5
K-pH3.75	1	142.5					K-pH3.75	2	147					K-pH3.3	1	137.5					K-pH3.3	2	129					K-pH3.3	3	3	149					K-pH3.3	4	130.5
K-pH3.75	1	165					K-pH3.75	2	147					K-pH3.3	1	141					K-pH3.3	2	127.5					K-pH3.3	4	3	162					K-pH3.3	4	132
K-pH3.75	1	147					K-pH3.75	2	150					K-pH3.3	1	100.5					K-pH3.3	2	106.5					K-pH3.3	5	3	168					K-pH3.3	4	132
K-pH3.75	1	148.5					G-pH3.75	2	139.5	147.857	7.23829			K-pH3.3	1	130.5					K-pH3.3	2	136.5					K-pH3.3	6	3	153					K-pH3.3	4	142.5
K-pH3.75	1	138					G-pH3.75	2	138					K-pH3.3	1	141					K-pH3.3	2	127.5					K-pH3.3	7	3	162					K-pH3.3	4	144
K-pH3.75	1	139.5					G-pH3.75	2	153					K-pH3.3	1	141					K-pH3.3	2	123.5					K-pH3.3	8	3	142.5					K-pH3.3	4	136.5
G-pH3.75	1	160.5	164.062	7.30185			G-pH3.75	2	156					G-pH3.3	1	120	142.5	15.6296			G-pH3.3	2	-	124.714	6.8972			G-pH3.3	1	3	142.5	142.688	8.42588			G-pH3.3	4	142.5	124.188	19.9838
G-pH3.75	1	163.5					G-pH3.75	2	153					G-pH3.3	1	160.5					G-pH3.3	2	120					G-pH3.3	2	3	135					G-pH3.3	4	78
G-pH3.75	1	165					G-pH3.75	2	151.5					G-pH3.3	1	144					G-pH3.3	2	121.5					G-pH3.3	3	3	135					G-pH3.3	4	135
G-pH3.75	1	178.5					G-pH3.75	2	144					G-pH3.3	1	136.5					G-pH3.3	2	124.5					G-pH3.3	4	3	154.5					G-pH3.3	4	120
G-pH3.75	1	169.5												G-pH3.3	1	151.5					G-pH3.3	2	132					G-pH3.3	5	3	156					G-pH3.3	4	129
G-pH3.75	1	154.5												G-pH3.3	1	130.5					G-pH3.3	2	133.5					G-pH3.3	6	3	135					G-pH3.3	4	123
G-pH3.75	1	159												G-pH3.3	1	165					G-pH3.3	2	114					G-pH3.3	7	3	142.5					G-pH3.3	4	130.5
G-pH3.75	1	162												G-pH3.3	1	132					G-pH3.3	2	127.5					G-pH3.3	8	3	141					G-pH3.3	4	135.5
K-pH4	1	150	154.5	4.46414										K-pH3.4	1	141	139.312	6.02339			K-pH3.4	2	139.5	131.062	7.56136			K-pH3.4	1	3	158.5	146.062	6.59782			K-pH3.4	4	147	138.75	13.5357
K-pH4	1	153												K-pH3.4	1	133.5					K-pH3.4	2	123					K-pH3.4	2	3	142.5					K-pH3.4	4	139.5
K-pH4	1	154.5												K-pH3.4	1	141					K-pH3.4	2	136.5					K-pH3.4	3	3	144.5					K-pH3.4	4	109.5
K-pH4	1	162												K-pH3.4	1	148.5					K-pH3.4	2	139.5					K-pH3.4	4	3	142.5					K-pH3.4	4	141
K-pH4	1	160.5												K-pH3.4	1	144					K-pH3.4	2	132					K-pH3.4	5	3	154.5					K-pH3.4	4	144
K-pH4	1	153												K-pH3.4	1	139.5					K-pH3.4	2	118.5					K-pH3.4	6	3	142.5					K-pH3.4	4	156
K-pH4	1	150												K-pH3.4	1	129					K-pH3.4	2	130.5					K-pH3.4	7	3	142.5					K-pH3.4	4	139.5
K-pH4	1	153												K-pH3.4	1	138					K-pH3.4	2	129					K-pH3.4	8	3	141					K-pH3.4	4	133.5
G-pH4	1	175.5	175.375	6.53425										G-pH3.4	1	144	143.125	3.45119			G-pH3.4	2	135	146.812	5.75039			G-pH3.4	1	3	147	138.938	7.56136			G-pH3.4	4	150	142.312	5.80602
G-pH4	1	173.5												G-pH3.4	1	141					G-pH3.4	2	153					G-pH3.4	2	3	138					G-pH3.4	4	132
G-pH4	1	177												G-pH3.4	1	147					G-pH3.4	2	150					G-pH3.4	3	3	133.5					G-pH3.4	4	138
G-pH4	1	166												G-pH3.4	1	137					G-pH3.4	2	153					G-pH3.4	4	3	142.5					G-pH3.4	4	147
G-pH4	1	180												G-pH3.4	1	147					G-pH3.4	2	147					G-pH3.4	5	3	147					G-pH3.4	4	147
G-pH4	1	169.5												G-pH3.4	1	145.5					G-pH3.4	2	145.5					G-pH3.4	6	3	142.5					G-pH3.4	4	142.5
G-pH4	1	174												G-pH3.4	1	141					G-pH3.4	2	145.5					G-pH3.4	7	3	136.5					G-pH3.4	4	139.5
G-pH4	1	187.5												G-pH3.4	1	142.5					G-pH3.4	2	145.5					G-pH3.4	8	3	124.5					G-pH3.4	4	142.5
														K-pH3.5	3	156	144.938	9.27915			K-pH3.5	4	150	140.25	6.80336			K-pH3.5	1	5	142.5	144.938	3.58008			K-pH3.5	6	142.5	142.875	4.37321
														K-pH3.5	3	151.5					K-pH3.5	4	132					K-pH3.5	2	5	138					K-pH3.5	6	139.5
														K-pH3.5	3	127.5					K-pH3.5	4	138					K-pH3.5	3	5	147					K-pH3.5	6	145.5
														K-pH3.5	3	151.5					K-pH3.5	4	133.5					K-pH3.5	4	5	144					K-pH3.5	6	147
														K-pH3.5	3	138					K-pH3.5	4	141					K-pH3.5	5	5	145.5					K-pH3.5	6	141
														K-pH3.5	3	141					K-pH3.5	4	135					K-pH3.5	6	5	145.5					K-pH3.5	6	135
														K-pH3.5	3	144					K-pH3.5	4	148.5					K-pH3.5	7	5	147					K-pH3.5	6	144
														K-pH3.5	3	150					K-pH3.5	4	144					K-pH3.5	8	5	150					K-pH3.5	6	148.5
														G-pH3.5	3	121.5	135.375	10.6595			G-pH3.5	4	153	144.562	5.94281			G-pH3.5	1	5	133.5	144.938	7.03277			G-pH3.5	6	151.5	150.188	5.52228
														G-pH3.5	3	120					G-pH3.5	4	139.5					G-pH3.5	2	5	154.5					G-pH3.5	6	144
														G-pH3.5	3	133.5					G-pH3.5	4	144					G-pH3.5	3	5	136.5					G-pH3.5	6	156
														G-pH3.5	3	136.5					G-pH3.5	4	141					G-pH3.5	4	5	147					G-pH3.5	6	147
														G-pH3.5	3	142.5					G-pH3.5	4	154.5					G-pH3.5	5	5	148.5					G-pH3.5	6	154.5
														G-pH3.5	3	142.5					G-pH3.5	4	139.5					G-pH3.5	6	5	142.5					G-pH3.5	6	141
														G-pH3.5	3	151.5					G-pH3.5	4	141					G-pH3.5	7	5	150					G-pH3.5	6	153
														G-pH3.5	3	135					G-pH3.5	4	144					G-pH3.5	8	5	147					G-pH3.5	6	154.5
														G 1mM	1	108	114	8.48528			G 1mM	2	-	102	#DIV/0!			G 1mM	1	3	-	132	#DIV/0!			G 1mM	4	-	#DIV/0!	#DIV/0!
														G 1mM	1	-					G 1mM	2	-					G 1mM	2	3	-					G 1mM	4	-
														G 1mM	1	-					G 1mM	2	-					G 1mM	3	3	-					G 1mM	4	-
														G 1mM	1	-					G 1mM	2	-					G 1mM	4	3	-					G 1mM	4	-
														G 1mM	1	-					G 1mM	2	-					G 1mM	5	3	-					G 1mM	4	-
														G 1mM	1	-					G 1mM	2	-					G 1mM	6	3	-					G 1mM	4	-
														G 1mM	1	-					G 1mM	2	-					G 1mM	7	3	-					G 1mM	4	-
														G 1mM	1	120					G 1mM	2	102					G 1mM	8	3	132					G 1mM	4	-

## Sheet: Developmental delays
Glyphosate
Developmental delay [DD] rate at 24 hpf
unbuffered
Treatment	Run	# Individuals	# potential DDs	# DDs	DDs [%]
Control	1	32	96	0	0
10 µM	1	32	96	0	0
50 µM	1	32	96	0	0
100 µM	1	32	96	0	0
250 µM	1	32	96	21	21.875
500 µM	1	29	87	13	14.9425
750 µM	1	19	57	10	17.5439
1 mM	1	0	-	-	-
10 mM	1	0	-	-	-
7dSh	1	32	96	0	0
Control	2	32	96	0	0
10 µM	2	32	96	0	0
50 µM	2	32	96	0	0
100 µM	2	32	96	0	0
250 µM	2	30	90	20	22.2222
500 µM	2	23	69	17	24.6377
750 µM	2	16	48	7	14.5833
1 mM	2	1	3	0	0
10 mM	2	0	-	-	-
7dSh	2	32	96	1	1.04167
Control	3	32	96	0	0
10 µM	3	31	93	0	0
50 µM	3	32	96	0	0
100 µM	3	32	96	0	0
250 µM	3	31	93	21	22.5806
500 µM	3	31	93	20	21.5054
750 µM	3	12	36	9	25
1 mM	3	5	15	5	33.3333
10 mM	3	0	-	-	-
7dSh	3	31	93	0	0
pH 7
Control	4	32	96	0	0
10 µM	4	31	93	0	0
50 µM	4	32	96	0	0
100 µM	4	32	96	0	0
250 µM	4	32	96	0	0
500 µM	4	32	96	0	0
750 µM	4	32	96	0	0
1 mM	4	32	96	0	0
10 mM	4	32	96	0	0
HCl	4	24	72	10	13.8889
Control	5	32	96	0	0
10 µM	5	32	96	0	0
50 µM	5	31	93	0	0
100 µM	5	32	96	0	0
250 µM	5	32	96	0	0
500 µM	5	32	96	0	0
750 µM	5	32	96	0	0
1 mM	5	32	96	1	1.04167
10 mM	5	32	96	0	0
HCl	5	31	93	21	22.5806
Control	6	32	96	0	0
10 µM	6	32	96	0	0
50 µM	6	32	96	3	3.125
100 µM	6	32	96	0	0
250 µM	6	32	96	0	0
500 µM	6	32	96	0	0
750 µM	6	31	93	0	0
1 mM	6	32	96	1	1.04167
10 mM	6	32	96	0	0
HCl	6	26	78	11	14.1026
pH range
Treatment	Run	# Individuals	# potential DDs	# DDs	DDs [%]
K-pH7	1	32	96	0	0
K-pH3	1	0	-	-	-
G-pH3	1	0	-	-	-
K-pH4	1	32	96	9	9.375
G-pH4	1	32	96	16	16.6667
K-pH5	1	32	96	0	0
G-pH5	1	32	96	0	0
K-pH6	1	32	96	0	0
G-pH6	1	32	96	0	0
K-pH8	1	32	96	0	0
G-pH8	1	32	96	0	0
Control	1	32	96	0	0
K-pH3	1	0	-	-	-
G-pH3	1	0	-	-	-
K-pH3.25	1	4	12	1	8.33333
G-pH3.25	1	7	21	0	0
K-pH3.5	1	23	69	5	7.24638
G-pH3.5	1	30	90	9	10
K-pH3.75	1	31	93	13	13.9785
G-pH3.75	1	32	96	16	16.6667
K-pH4	1	32	96	4	4.16667
G-pH4	1	32	96	3	3.125
Control	2	32	96	0	0
K-pH3.25	2	30	90	14	15.5556
G-pH3.25	2	21	63	5	7.93651
K-pH3.35	1	30	90	15	16.6667
G-pH3.35	1	25	75	13	17.3333
K-pH3.5	2	30	90	19	21.1111
G-pH3.5	2	27	81	19	23.4568
K-pH3.75	2	32	96	13	13.5417
G-pH3.75	2	28	84	11	13.0952
Control	3	32	96	0	0
K-pH3	1	0	-	-	-
G-pH3	1	0	-	-	-
K-pH3.1	1	1	3	1	33.3333
G-pH3.1	1	0	-	-	-
K-pH3.2	1	10	30	2	6.66667
G-pH3.2	1	3	9	0	0
K-pH3.3	1	22	66	1	1.51515
G-pH3.3	1	17	51	5	9.80392
K-pH3.4	1	23	69	4	5.7971
G-pH3.4	1	27	81	1	1.23457
K-pH3.5	3	31	93	8	8.60215
G-pH3.5	3	31	93	5	5.37634
G 1mM	1	6	18	0	0
Control	4	32	96	0	0
K-pH3	2	1	3	0	0
G-pH3	2	0	-	-	-
K-pH3.1	2	5	15	1	6.66667
G-pH3.1	2	7	21	1	4.7619
K-pH3.2	2	16	48	3	6.25
G-pH3.2	2	13	39	6	15.3846
K-pH3.3	2	26	78	5	6.41026
G-pH3.3	2	18	54	7	12.963
K-pH3.4	2	28	84	11	13.0952
G-pH3.4	2	29	87	14	16.092
K-pH3.5	4	29	87	11	12.6437
G-pH3.5	4	31	93	14	15.0538
G 1mM	2	2	6	0	0
Control	5	32	96	0	0
K-pH3	3	0	-	-	-
G-pH3	3	0	-	-	-
K-pH3.1	3	1	3	0	0
G-pH3.1	3	1	3	0	0
K-pH3.2	3	3	9	1	11.1111
G-pH3.2	3	7	21	2	9.52381
K-pH3.3	3	14	42	6	14.2857
G-pH3.3	3	20	60	4	6.66667
K-pH3.4	3	24	72	5	6.94444
G-pH3.4	3	23	69	3	4.34783
K-pH3.5	5	30	90	6	6.66667
G-pH3.5	5	24	72	8	11.1111
G 1mM	3	6	18	1	5.55556
Control	6	31	93	0	0
K-pH3	4	0	-	-	-
G-pH3	4	0	-	-	-
K-pH3.1	4	1	3	0	0
G-pH3.1	4	0	0	-	-
K-pH3.2	4	8	24	3	12.5
G-pH3.2	4	2	6	2	33.3333
K-pH3.3	4	19	57	7	12.2807
G-pH3.3	4	17	51	12	23.5294
K-pH3.4	4	29	87	7	8.04598
G-pH3.4	4	29	87	7	8.04598
K-pH3.5	6	31	93	9	9.67742
G-pH3.5	6	30	90	13	14.4444
G 1mM	4	0	0	-	-

## Sheet: Malformations
Glyphosate
Malformation [MF] rate at 96 hpf
unbuffered
Treatment	Run	# Individuals	# potential MFs	# MFs	MFs [%]
Control	1	32	128	1	0.78125
10 µM	1	32	128	0	0
50 µM	1	32	128	4	3.125
100 µM	1	32	128	4	3.125
250 µM	1	32	128	29	22.6562
500 µM	1	18	72	17	23.6111
750 µM	1	1	4	1	25
1 mM	1	-	-	-	-
10 mM	1	-	-	-	-
7 dSh	1	32	128	0	0
Control	2	32	128	0	0
10 µM	2	32	128	7	5.46875
50 µM	2	32	128	10	7.8125
100 µM	2	32	128	13	10.1562
250 µM	2	30	120	12	10
500 µM	2	21	84	8	9.52381
750 µM	2	3	12	2	16.6667
1 mM	2	-	-	-	-
10 mM	2	-	-	-	-
7 dSh	2	32	128	0	0
Control	3	32	128	0	0
10 µM	3	31	124	2	1.6129
50 µM	3	32	128	7	5.46875
100 µM	3	32	128	1	0.78125
250 µM	3	31	124	10	8.06452
500 µM	3	30	120	18	15
750 µM	3	2	8	1	12.5
1 mM	3	-	-	-	-
10 mM	3	-	-	-	-
7 dSh	3	31	124	1	0.806452
pH 7
Control	4	32	128	1	0.78125
10 µM	4	31	124	0	0
50 µM	4	32	128	2	1.5625
100 µM	4	32	128	0	0
250 µM	4	31	124	0	0
500 µM	4	31	124	0	0
750 µM	4	32	128	1	0.78125
1 mM	4	31	124	6	4.83871
10 mM	4	32	128	11	8.59375
HCl	4	21	84	14	16.6667
Control	5	32	128	0	0
10 µM	5	32	128	2	1.5625
50 µM	5	31	124	3	2.41935
100 µM	5	32	128	5	3.90625
250 µM	5	32	128	1	0.78125
500 µM	5	32	128	5	3.90625
750 µM	5	32	128	7	5.46875
1 mM	5	32	128	13	10.1562
10 mM	5	32	128	9	7.03125
HCl	5	31	124	9	7.25806
Control	6	32	128	1	0.78125
10 µM	6	32	128	2	1.5625
50 µM	6	31	124	2	1.6129
100 µM	6	32	128	5	3.90625
250 µM	6	32	128	0	0
500 µM	6	32	128	1	0.78125
750 µM	6	31	124	1	0.806452
1 mM	6	32	128	6	4.6875
10 mM	6	32	128	8	6.25
HCl	6	16	64	6	9.375
pH range
Treatment	Run	# Individuals	# potential MFs	# MFs	MFs [%]
K-pH7	1	32	128	14	10.9375
K-pH3	1	0	-	-	-
G-pH3	1	0	-	-	-
K-pH4	1	32	128	6	4.6875
G-pH4	1	32	128	21	16.4062
K-pH5	1	32	128	17	13.2812
G-pH5	1	32	128	0	0
K-pH6	1	32	128	17	13.2812
G-pH6	1	32	128	2	1.5625
K-pH8	1	32	128	14	10.9375
G-pH8	1	32	128	0	0
Control	1	32	128	2	1.5625
K-pH3	1	0	0	-	-
G-pH3	1	0	0	-	-
K-pH3.25	1	0	0	-	-
G-pH3.25	1	0	0	-	-
K-pH3.5	1	22	88	7	7.95455
G-pH3.5	1	30	120	3	2.5
K-pH3.75	1	31	124	11	8.87097
G-pH3.75	1	32	128	10	7.8125
K-pH4	1	32	128	5	3.90625
G-pH4	1	31	124	0	0
Control	2	32	128	0	0
K-pH3.25	2	25	100	4	4
G-pH3.25	2	16	64	2	3.125
K-pH3.35	2	22	88	3	3.40909
G-pH3.35	2	24	96	7	7.29167
K-pH3.5	2	30	120	10	8.33333
G-pH3.5	2	27	108	5	4.62963
K-pH3.75	2	32	128	3	2.34375
G-pH3.75	2	27	108	0	0
Control	3	32	128	2	1.5625
K-pH3	1	0	0	-	-
G-pH3	1	0	0	-	-
K-pH3.1	1	0	0	-	-
G-pH3.1	1	0	0	-	-
K-pH3.2	1	0	0	-	-
G-pH3.2	1	0	0	-	-
K-pH3.3	1	6	24	0	0
G-pH3.3	1	8	32	0	0
K-pH3.4	1	12	48	2	4.16667
G-pH3.4	1	27	108	7	6.48148
K-pH3.5	3	30	120	6	5
G-pH3.5	3	30	120	0	0
G 1mM	1	0	0	-	-
Control	4	32	128	0	0
K-pH3	2	0	0	-	-
G-pH3	2	0	0	-	-
K-pH3.1	2	0	0	-	-
G-pH3.1	2	0	0	-	-
K-pH3.2	2	4	16	0	0
G-pH3.2	2	0	0	-	-
K-pH3.3	2	13	52	0	0
G-pH3.3	2	8	32	2	6.25
K-pH3.4	2	25	100	2	2
G-pH3.4	2	26	104	5	4.80769
K-pH3.5	3	25	100	3	3
G-pH3.5	3	29	116	10	8.62069
G 1mM	2	0	0	-	-
Control	5	32	128	0	0
K-pH3	3	0	0	-	-
G-pH3	3	0	0	-	-
K-pH3.1	3	0	0	-	-
G-pH3.1	3	0	0	-	-
K-pH3.2	3	0	0	-	-
G-pH3.2	3	1	4	0	0
K-pH3.3	3	4	16	0	0
G-pH3.3	3	10	40	0	0
K-pH3.4	3	18	72	2	2.77778
G-pH3.4	3	19	76	2	2.63158
K-pH3.5	5	30	120	0	0
G-pH3.5	5	22	88	2	2.27273
G 1mM	3	0	0	-	-
Control	6	31	124	0	0
K-pH3	4	0	0	-	-
G-pH3	4	0	0	-	-
K-pH3.1	4	0	0	-	-
G-pH3.1	4	0	0	-	-
K-pH3.2	4	0	0	-	-
G-pH3.2	4	0	0	-	-
K-pH3.3	4	6	24	3	12.5
G-pH3.3	4	7	28	0	0
K-pH3.4	4	21	84	3	3.57143
G-pH3.4	4	22	88	2	2.27273
K-pH3.5	6	25	100	1	1
G-pH3.5	6	26	104	4	3.84615
G 1mM	4	0	0	-	-
